# Supplementary material
Source: Springer Nature journal article supplement (https://www.springermedizin.de/resource/supplementary/12879_2013_3671_MOESM9_ESM.pdf/9446412)

# Influenza A

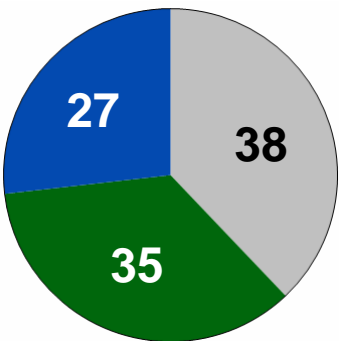

# Influenza B

## TIV

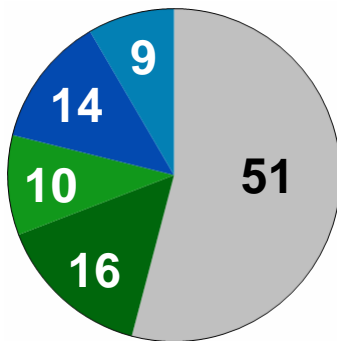

## QIV

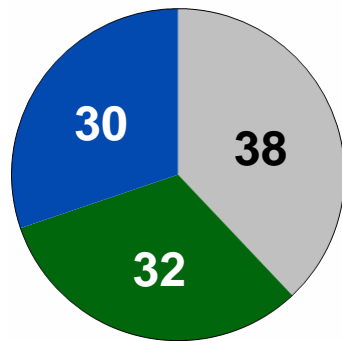

Supplement: MOESM9 [file 9446412]
